# Supplementary material
Source: PubMed Central journal article supplement (PMC7456332)
Supplement: NIHMS1614381-supplement-1.pdf [file NIHMS1614381-supplement-1.pdf]

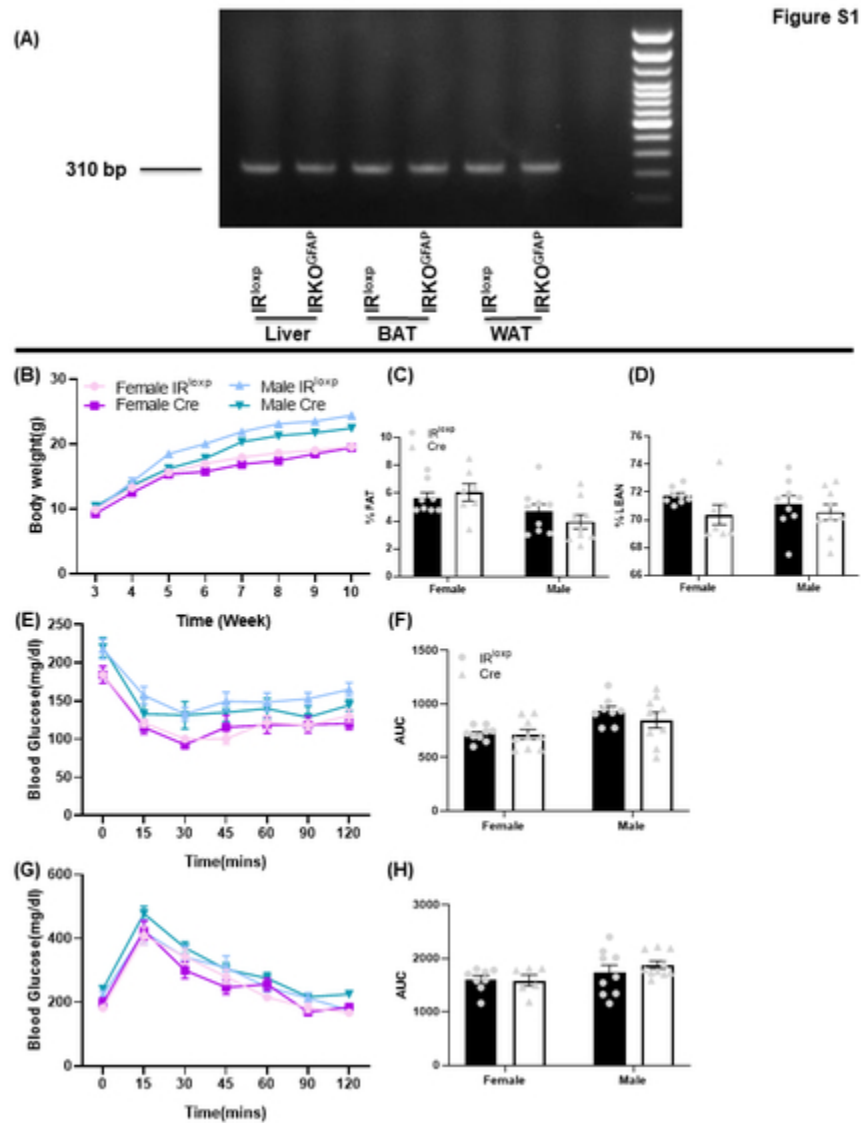

Figure S1. Similar body composition, glucose tolerance and insulin sensitivity between IRloxP and Cre control groups at 2 months of age.

18x24mm (600 x 600 DPI)

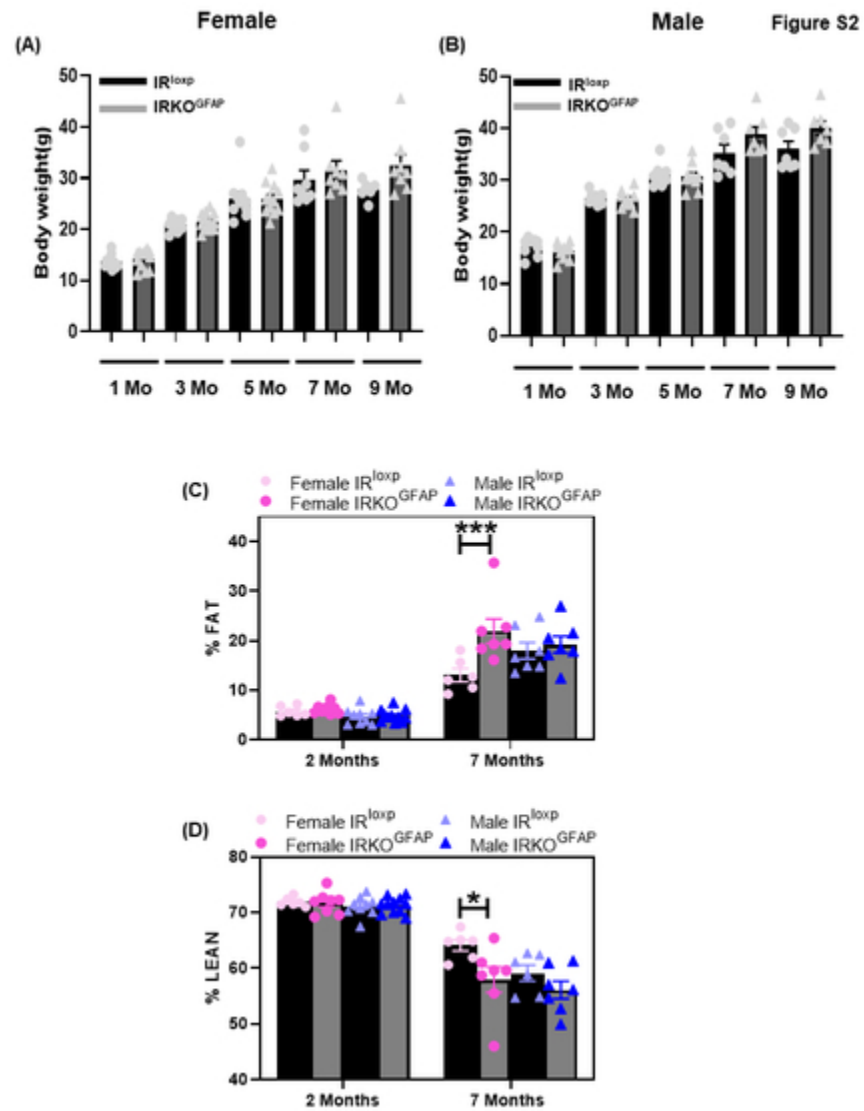

Figure S2. IRKOGFAP female mice display higher fat mass (%) and lower lean mass (%) at 7 months of age.

18x24mm (600 x 600 DPI)

Figure S3

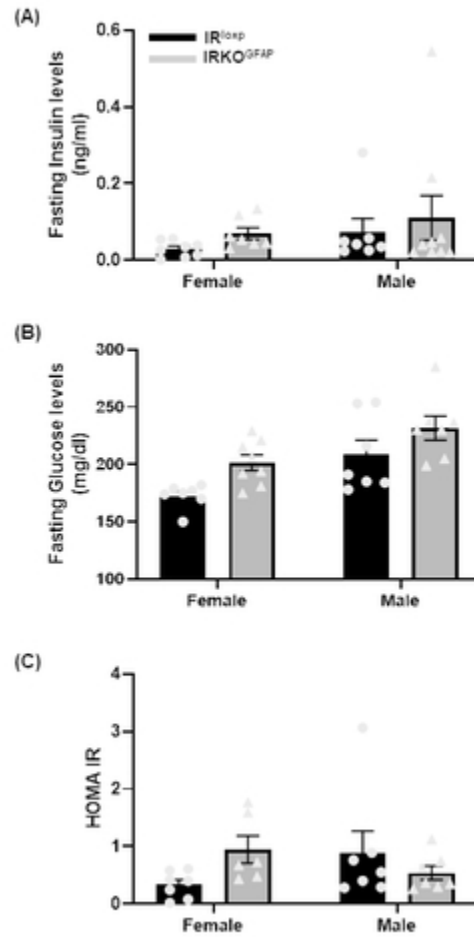

Figure S3. Comparable HOMA IR score between control and IRKOGFAP mice at 7-8 months of age.

18x24mm (600 x 600 DPI)

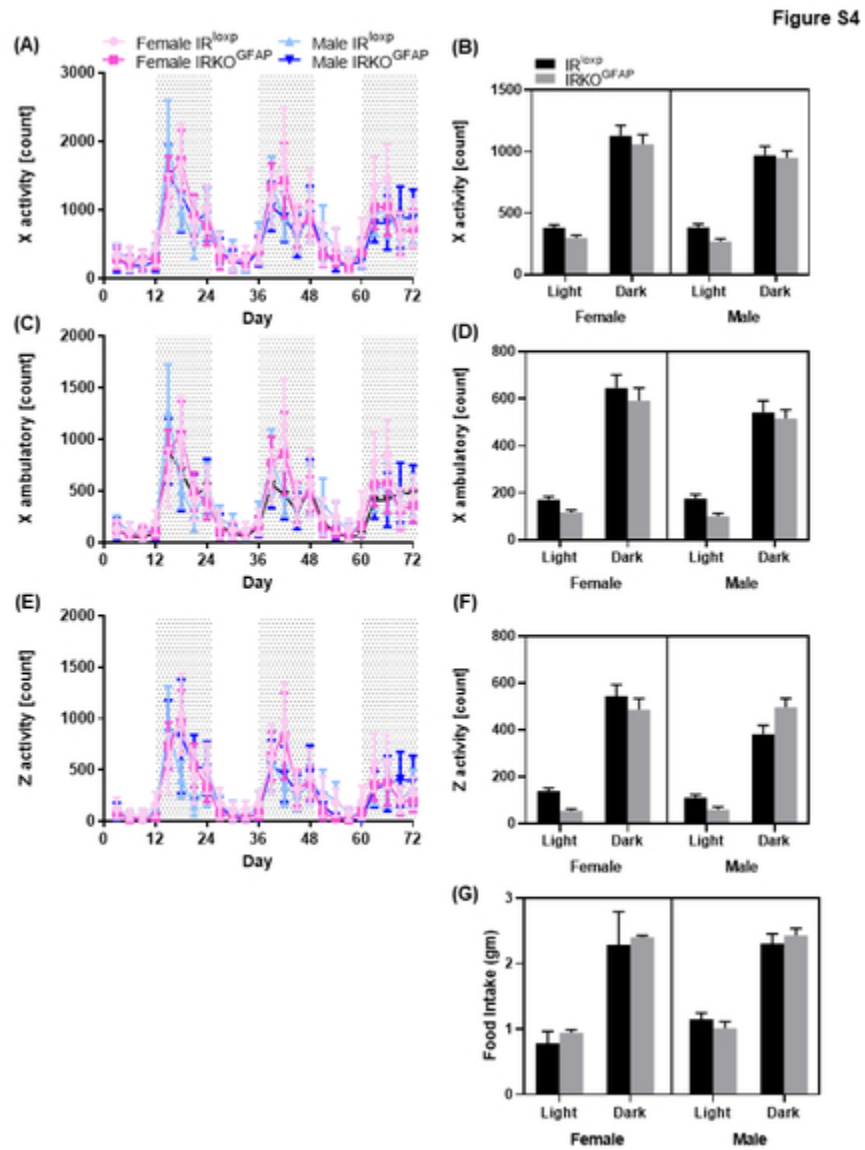

Figure S4. IRKOGFAP mice show comparable locomotor activity and food intake at 7-8 months of age.

18x24mm (600 x 600 DPI)
